# Supplementary material for: SFM study of the surface of halogen-bonded hybrid co-crystals containing long-chain perfluorocarbons
Source: Royal Society of Chemistry journal article supplement (doi:10.1039/b815816a), 2008-12-22
Supplement: b815816a.pdf [file b815816a.pdf]

### Electronic Supplementary Information

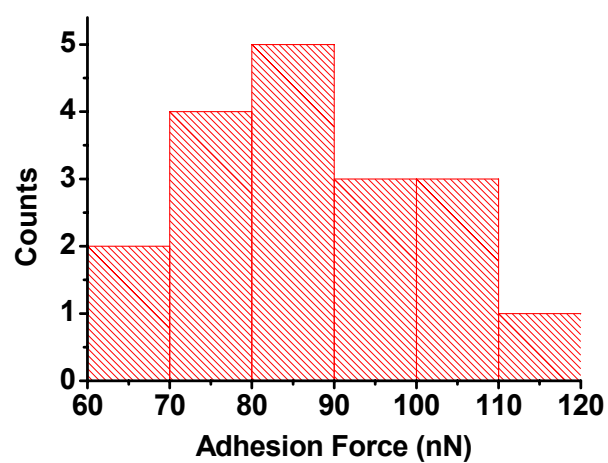

Histogram for type A curves showing the distribution of adhesion forces.
